# Supplementary material for: Comprehensive Analysis of TIFY Transcription Factors and Their Expression Profiles under Jasmonic Acid and Abiotic Stresses in Watermelon
Source: Int J Genomics. 2019 Oct 1;2019:6813086. doi: 10.1155/2019/6813086 (PMC6791283; doi:10.1155/2019/6813086)
Supplement: Supplementary 2 — Supplementary Table S1 Primer sequences used in qRT-PCR. [file 6813086.f2.xls]

## Sheet: Sheet1
Table S1. Primer sequences used in qRT-PCR.
Gene ID	Annotations	Forward primer	Reverse primer
β-actin	Cla007792	CCATGTATGTTGCCATCCAG	GGATAGCATGGGGTAGAGCA
ClJAZ1	Cla009781	GCCAACAACTCACCATCTTC	CTTGAACCCTATGCTTCCTCT
ClJAZ3	Cla011143	GACAGAGTCGGCGACGTTATG	CAGGTTGTGGCTGCGAGGGA
ClJAZ4	Cla018445	TCCGCATTCTAAGGGTCATA	GGCAAGTGTTTATCCGTTCT
ClTIFY1	Cla020951	AGCCAAGACTGAAGGTGTAGC	ATCAGCCTTGTTTGGATGGA
ClPPD1	Cla007531	AGGCGAGTCGGCAAGTTTCA	TGCGTCCTCATTGGATGGTTCA
ClJAZ7	Cla012536	AATTGTGCCTTGTTCCAGAT	TGCAATGGGTAAATCGCTAG
ClZML1	Cla022146	AGGCTCCAGTAATCCTTCCA	GAGGTTCCTGCTCATCGTCA
ClZML2	Cla022147	AAGATGAAAGTCCACCAGAAA	AGTCTAAGTCCTTGCCACCA
ClTIFY2	Cla022284	TCAACTTCTAAGCCAATCAAC	AATGGAACTCCCAGCAACAC
ClZML3	Cla015488	AATGATGCGACGTGGACCTG	ATCCCAACATAGAATGGAATAACC
ClJAZ8	Cla015533	ATTCTTCTGATTTGCCTATTGC	TGGTTCACTTGGTATGGTGC
